# Supplementary material for: Local Beryllium-10 production rate for the mid-elevation mountainous regions in Central Europe, deduced from a multi-method study of moraines and lake sediments in the Black Forest
Source: Copernicus journal article supplement (doi:10.5194/gchron-2023-27), 2024-01-09
Supplement: Supplementary file 1 [file gchron-2023-27-supplement.zip]

Archive with 2 entries (2 files):
- Hofmann_et_al_GEOCHRONOLOGY_suppl.pdf
- Hofmann_et_al_Geochronology_TableS20.ods
