# Supplementary material for: Local Beryllium-10 production rate for the mid-elevation mountainous regions in Central Europe, deduced from a multi-method study of moraines and lake sediments in the Black Forest
Source: Copernicus journal article supplement (doi:10.5194/gchron-2023-27), 2024-01-09
Supplement: Supplementary file 1 [file gchron-2023-27-supplement.zip › Hofmann_et_al_Geochronology_TableS20.ods]

## Sheet: Tabelle1
Sample	Latitude (° N WGS 1984)	Longitude (° E WGS 1984)	Elevation (m a.s.l.)	10Be concentration (atoms g-1 quartz)	1s uncertainty of the 10Be concentration (atoms g-1 quartz)	Topographic shielding factor	Rock density (g cm-3)	Sample thickness (cm)	Postdepositional weathering rate (cm a-1)
FS-01a	47.872193	8.033919	1128	134504	4725	0.958616	2.65	1.5	0
FS-02a	47.872164	8.035611	1113	135802	5343	0.947912	2.65	2.4	0
FS-02b	47.871428	8.037746	1103	140611	5307	0.987496	2.65	2.6	0
FS-02c	47.869931	8.036674	1108	142114	4623	0.987583	2.65	2	0
FS-02d	47.870075	8.037022	1107	92276	4208	0.988521	2.65	1.9	0
FS-03a	47.869613	8.037770	1108	160738	13164	0.989194	2.65	2.1	0
FS-03c	47.869732	8.037687	1110	141544	4610	0.985596	2.65	1.9	0
FS-03d	47.87128	8.038474	1099	133327	4670	0.989967	2.65	2	0
FS-03e	47.870467	8.038263	1106	144143	5434	0.960224	2.65	2.4	0
FS-03f	47.870475	8.038298	1106	147407	6368	0.985626	2.65	2.8	0
